# Supplementary material for: ClNAC100 Is a NAC Transcription Factor of Chinese Fir in Response to Phosphate Starvation
Source: MDPI journal article supplement (doi:10.3390/ijms241310486), 2023-06-22
Supplement: s1 [file s1]

*CINAC100* CDS sequence:

1245bp

ATGGAGGCCATGAATGGGAAGATGATGAATAGGATTGATGATGAGAATCTGCCCCCAG  
GATTCAGGTTCCATCCCATGGATGAGGAATTGGTGACCTATTATCTTCAACAGAAGGTT  
CTTGATAGCAGTTTTGCCTGCAGAGCCATTGCTGAAGTTGATCTGAACAAGTGTGAGC  
CTTGGGATCTACCAGCCAGAGCCAAAATGGGAGAAAAGGAGTGGTACTTCTTCTCTCT  
GAGGGACCGAAAGTATCCCCTGGTCTACGCACTAACAGAGCCACACAGGCAGGATA  
CTGGAAAGCAACAGGGAAAGACAGAGAAGTTTTCAAAGGGAGAACTTCTATTCTTGT  
GGGTATGAAGAAAACCTCTGGTTTTCTACAAAGGGAGAGCACCCAAAGGGGAGAAAA  
GCAACTGGGTAAATGCATGAATACCGCCTGGAGGGCAAGTTTTCTTCAATCTCCCC  
AAGACCGCCAAGGATGAATGGGTGGTGACAAGAATATTTAGAAATCTTGTGGACCA  
AAGAAGGGCCCGCTAGCCCTGAGTAGGAGTTCAAATTATCTAAACGATTTGGACTCTC  
CAGCTCTTCTCCACTATTGGAATCGTCACCTTACGTCCCCTCAAATGGACAAGGAGG  
CAGCAGCGAGTCAGTGGAACAGCATGTGACCTGCTTCTCCACTCCCATTGACAAATCT  
TGCAGCAACAACCTTCAACAGAGATCAATTCAGGAATCCTTCTGATACAGTAGACTACT  
CTTTTCTCCACAATATCATGCAAAGTGACCCAGTTTACATGAACAACAATCCTAATGCC  
TTAAGGCAGAGCTCCCATGATTTACATATAAATACCCACAGCAGCTTCCATCATTTTC  
CATGGCCCCAAATCCTCCAAACTTCCCAATGGTCTCTCAACTTTTCTCTCAAGGTGGTC  
TTGGGCTTCCTTCAAATTCCTTCTTAGGGCCCTCTATGAAGGAGTTGGCACCAATGAA  
ATGATGGGCTTGAAGCAATGCAAGATGGAGCCACCCTCTTCCTCATTGCTCATGACA  
GAGTATGGGAAATGAATGCAAAATACAGATCAGTTAATAATTCTCAGCCTCAGCCTCA  
GCCCATGGTCAGCATGTCACAAGAGACAGGACTCACATCAGAGATCAACAACACAG  
AGATATCTAGTCAACTGACTCACTATCCAGAAGATCAGGGCAATCCTTCATCAGTTGA  
CCTATCAGATTTCTGGTCTTCCTACTGA

*CINAC100* promoter sequence:

AAGCTTAGGTGAATGTATTGGAATATGTGTGTATAAGGATAAGGTGGGGGTCAAGTTTA  
TGAGAATGTGTGTGTATAGGGGTGGGTAAAATCTAGAAAAATAAGCCCAACTTCATAC  
AGTACTAGCACTTGCACCCATATGAGGTTCAAGGAATACGACATAGGAACAATCGACC  
AATTTAGAAAATTTTCCGGCGTGAATTTTTTTTACGGTGTGAGAGAATTCTAAGCACTAT  
AATACTCACATATAAAAGCCTATCGACTAATTACACCATATATACATATATCAAGACATT  
CTCTCAAATAAACACAAAATTAATAAAAAAATGACATATGTATACAATATTATATTTA  
ATTTTTTTTTTAAAAAAAACCTCATTTTTCCCATTTATATTACTAAAGACAAAGAGAC  
AAAGAGGTCTACTTTAATACAAATTGTGAAACATTTGTTGATAGAAAGAAAAAATAAT  
AAAAATGCATTAACAACCTTCAAAGTTTTCACTTCTTACCTCTTTATTTAAACTATAAA  
ACATAATTTATTTTTATTTTAAACTTCTTTGTTGAGATAGATTTTTTAAAAAACGATTTT  
ATAATGTATGGCACAATAAAATGAGTTTAATAACAATTTAAATAATGCCTCCAAGAAAT  
GGTCTTCGTATCAGAAAAATCTCCCTTTCTTCAATGGATGGTTTTTTTTTTAATTTTCAAA  
ATTTTTTTGGGGGAAGTTAGGTAGACTAGTTAGCCGAAAGGGATTGTAACCTTCCACC  
CTATAAGAAACGAGCATAAATAAATTGGACTGTTTCAACTCTTGCAGGGTAAGACCAT  
GGAAAAGGGAGTACGTTTGACCTTAAACAGGGTTTGGTAGATGGCTCACATTTCTAGG  
ACAGCGCGGGGGCGGAGGGCAATTTGGGAGACTGGGTCTGTGCGTTAAGGAAAATTT  
CAAAAAATGAAGAAGTCGCTTCATAATATTAAATGCAAAAGTTTGTTTTCTCATGTGAC  
CACGTGACTAACACTTTGCGGCGCTACAGTTTCTCTAGTCTTGTGCGGGTTGCCAGCAG

GCGTGGAGTTTGTAGCCGGAAGATTTCCCGCTAATCGAGGCGCCGGCCAGACTTTA  
TTACATGTCCTAACAGTGACGCCATATTTTCGTCAAGTCATCAGCCGCGCAGTTAAATAG  
GCAGCTTATCTCTTTTGCCGGGTAGAAATGACAAGTCAACAGTTAAATCATTTCATTT  
AAATAATAACAAGTCCCGTGAGTTTAAAACCGGGGCTTTGGCGCAACCCCCGCCGCG  
GAAATTAACGACGTTAGGGTTAACCTGGGTTAGAGAGGCGGGGTTAGTAGAGGTCCCT  
ACCACGTGGCGGCTTTGGGGACGTTGACTTGTTAGTGACGACGTGGAGCGTGGGGAG  
CCGTGGATTTGAGGGCGCTGTCCCAGTTGGGCAATTTTCGCGGGCAAAACGGGTGAAA  
ATGAAAGAATTAGGAAAAGGTGAATGAAAGGAGGCCACGCGAAGGGAACGCGGGAT  
TGGGAAGTTGTTACGTTGGGGGAGCTGACGTGGCTGGTGGAAAGCATGGGTGCATGG  
TAATTGCTGCGCTGACGTGGCGGGGATACGTTGGGTTAGACCCCTTGAGAGGGGTGGA  
AAACTGAAACAGGGTTAGGAAAGTTGGTTCGAGGAGAATCAGAAGTAGTTTTAGGTA  
GATAGAGAGAGGGGGGGATGAGAAAGTTGCTTGCGGAGTACGTAATTCTGAGTCTTCT  
GTCTCACTCTGCTGCACTTTCTCTATAAATCTAGGCTTGTTGTCTGAAGAGTTTTTAATA  
ACAGCCTTAAGAGATAGAGCAGTATTATAGGAGTTAGAGGGAGGCCCCCAAACCCTG  
AAACTGCCGCTTTTACTTGGTCTCTTTTATCTTTCTTTCTTTTAGCTTTTGAGAGCTGC  
AGTGCAGTGCCTGACAGGTCTTTGTGTTAGCTTCTTGTTAAAGAAATCTGTGTCTATCA  
GCACATTCTGAACATCATTCAATACATATACTACCCATTACCATAGCTTCTTTTTTCTG  
ACAACCTGAACAGATACAGATACTGTTTGTGTGCTGACTCTGTGCATGGGTGTATCATA  
AACCCATTCTGCTTAATTCTGTCATTATTGGTGTCTGAGTCCTGTAAGTGTAAGACTTT  
GCTCGTGTGTGTAGTATAGA
